# Supplementary material
Source: PubMed Central journal article supplement (PMC2518847)
Supplement: NIHMS59298-supplement-1.pdf [file NIHMS59298-supplement-1.pdf]

# Supporting Information

## List of Contents

Table 1. Levels of POB-DNA adducts in rats treated with (*R*)-NNN

Table 2. Levels of POB-DNA adducts in rats treated with (*S*)-NNN

Table 3. Levels of POB-DNA adducts in rats treated for 20 weeks with (*R*)-  
or (*S*)-NNN

Table 4. Statistical comparison of levels of each individual POB-DNA  
adduct

**Table 1. Levels of POB-DNA adducts in rats treated with (R)-NNN <sup>a</sup>**

**A. Esophagus**

| Time (weeks) | POB-DNA adducts (fmol/mg DNA)   |                             |           |                             |                                |                             | Total Adduct Levels <sup>c</sup> |
|--------------|---------------------------------|-----------------------------|-----------|-----------------------------|--------------------------------|-----------------------------|----------------------------------|
|              | <i>O</i> <sup>2</sup> -POB-dThd |                             | 7-POB-Gua |                             | <i>O</i> <sup>2</sup> -POB-Cyt |                             |                                  |
|              | Mean ± SD                       | Percentage (%) <sup>b</sup> | Mean ± SD | Percentage (%) <sup>b</sup> | Mean ± SD                      | Percentage (%) <sup>b</sup> |                                  |
| 1            | 110 ± 12                        | 28%                         | 210 ± 37  | 54%                         | 70 ± 13                        | 18%                         | 390                              |
| 2            | 100 ± 7                         | 28%                         | 200 ± 33  | 56%                         | 60 ± 7                         | 17%                         | 360                              |
| 5            | 100 ± 21                        | 36%                         | 130 ± 12  | 46%                         | 50 ± 12                        | 18%                         | 280                              |
| 10           | 110 ± 17                        | 34%                         | 150 ± 29  | 47%                         | 60 ± 23                        | 19%                         | 320                              |
| 16           | 100 ± 9                         | 32%                         | 160 ± 27  | 52%                         | 50 ± 14                        | 16%                         | 310                              |
| 20           | 90 ± 12                         | 35%                         | 140 ± 41  | 54%                         | 30 ± 8                         | 12%                         | 260                              |

**B. Liver**

| Time (weeks) | POB-DNA adducts (fmol/mg DNA)   |                             |           |                             |                                |                             | Total Adduct Levels <sup>c</sup> |
|--------------|---------------------------------|-----------------------------|-----------|-----------------------------|--------------------------------|-----------------------------|----------------------------------|
|              | <i>O</i> <sup>2</sup> -POB-dThd |                             | 7-POB-Gua |                             | <i>O</i> <sup>2</sup> -POB-Cyt |                             |                                  |
|              | Mean ± SD                       | Percentage (%) <sup>b</sup> | Mean ± SD | Percentage (%) <sup>b</sup> | Mean ± SD                      | Percentage (%) <sup>b</sup> |                                  |
| 1            | 20 ± 3                          | 57%                         | 10 ± 4    | 29%                         | 5 ± 2                          | 14%                         | 35                               |
| 2            | 30 ± 3                          | 43%                         | 30 ± 0    | 42%                         | 10 ± 4                         | 14%                         | 70                               |
| 5            | 40 ± 4                          | 50%                         | 40 ± 0    | 50%                         | 0                              | 0%                          | 80                               |
| 10           | 70 ± 36                         | 82%                         | 10 ± 10   | 12%                         | 5 ± 3                          | 6%                          | 85                               |
| 16           | 70 ± 12                         | 70%                         | 30 ± 0    | 30%                         | 0                              | 0%                          | 100                              |
| 20           | 40 ± 4                          | 100%                        | 0         | 0%                          | 0                              | 0%                          | 40                               |

**C. Lung**

| Time (weeks) | POB-DNA adducts (fmol/mg DNA)   |                             |           |                             |                                |                             | Total Adduct Levels <sup>c</sup> |
|--------------|---------------------------------|-----------------------------|-----------|-----------------------------|--------------------------------|-----------------------------|----------------------------------|
|              | <i>O</i> <sup>2</sup> -POB-dThd |                             | 7-POB-Gua |                             | <i>O</i> <sup>2</sup> -POB-Cyt |                             |                                  |
|              | Mean ± SD                       | Percentage (%) <sup>b</sup> | Mean ± SD | Percentage (%) <sup>b</sup> | Mean ± SD                      | Percentage (%) <sup>b</sup> |                                  |
| 1            | 130 ± 9                         | 59%                         | 60 ± 9    | 27%                         | 30 ± 6                         | 14%                         | 220                              |
| 2            | 210 ± 30                        | 68%                         | 70 ± 1    | 23%                         | 30 ± 5                         | 10%                         | 310                              |
| 5            | 450 ± 160                       | 76%                         | 110 ± 41  | 19%                         | 30 ± 7                         | 5%                          | 590                              |
| 10           | 660 ± 145                       | 70%                         | 180 ± 49  | 19%                         | 100 ± 33                       | 11%                         | 940                              |
| 16           | 1020 ± 804                      | 74%                         | 230 ± 188 | 17%                         | 120 ± 94                       | 9%                          | 1370                             |
| 20           | 470 ± 20                        | 72%                         | 100 ± 11  | 15%                         | 80 ± 21                        | 12%                         | 650                              |

- a. Each value is the mean ± S.D. of single analyses of DNA samples isolated from three rats or 3 pools of 3 rats per group at each time point.
- b. The percentage was calculated by dividing the mean level of each adduct by total adduct levels
- c. The value for total adduct levels is the sum of the mean levels of three POB-DNA adducts and rounded.

**Table 2. Levels of POB-DNA adducts in rats treated with (S)-NNN <sup>a</sup>**

**A. Esophagus**

| Time (weeks) | POB-DNA adducts (fmol/mg DNA)   |                             |           |                             |                                |                             | Total Adduct Levels <sup>c</sup> |
|--------------|---------------------------------|-----------------------------|-----------|-----------------------------|--------------------------------|-----------------------------|----------------------------------|
|              | <i>o</i> <sup>2</sup> -POB-dThd |                             | 7-POB-Gua |                             | <i>o</i> <sup>2</sup> -POB-Cyt |                             |                                  |
|              | Mean ± SD                       | Percentage (%) <sup>b</sup> | Mean ± SD | Percentage (%) <sup>b</sup> | Mean ± SD                      | Percentage (%) <sup>b</sup> |                                  |
| 1            | 340 ± 61                        | 32%                         | 490 ± 182 | 46%                         | 240 ± 111                      | 22%                         | 1070                             |
| 2            | 340 ± 52                        | 31%                         | 430 ± 133 | 39%                         | 320 ± 47                       | 29%                         | 1090                             |
| 5            | 440 ± 35                        | 34%                         | 550 ± 38  | 43%                         | 300 ± 17                       | 23%                         | 1290                             |
| 10           | 510 ± 8                         | 37%                         | 550 ± 88  | 40%                         | 320 ± 91                       | 23%                         | 1380                             |
| 16           | 460 ± 47                        | 37%                         | 560 ± 44  | 44%                         | 240 ± 14                       | 19%                         | 1260                             |
| 20           | 420 ± 4                         | 42%                         | 360 ± 71  | 36%                         | 230 ± 39                       | 23%                         | 1010                             |

**B. Liver**

| Time (weeks) | POB-DNA adducts (fmol/mg DNA)   |                             |           |                             |                                |                             | Total Adduct Levels <sup>c</sup> |
|--------------|---------------------------------|-----------------------------|-----------|-----------------------------|--------------------------------|-----------------------------|----------------------------------|
|              | <i>o</i> <sup>2</sup> -POB-dThd |                             | 7-POB-Gua |                             | <i>o</i> <sup>2</sup> -POB-Cyt |                             |                                  |
|              | Mean ± SD                       | Percentage (%) <sup>b</sup> | Mean ± SD | Percentage (%) <sup>b</sup> | Mean ± SD                      | Percentage (%) <sup>b</sup> |                                  |
| 1            | 100 ± 5                         | 59%                         | 50 ± 2    | 29%                         | 20 ± 5                         | 12%                         | 170                              |
| 2            | 170 ± 23                        | 50%                         | 140 ± 15  | 41%                         | 30 ± 9                         | 9%                          | 340                              |
| 5            | 240 ± 43                        | 62%                         | 120 ± 22  | 31%                         | 30 ± 8                         | 8%                          | 390                              |
| 10           | 310 ± 28                        | 78%                         | 70 ± 14   | 18%                         | 20 ± 5                         | 5%                          | 400                              |
| 16           | 370 ± 111                       | 74%                         | 110 ± 30  | 22%                         | 20 ± 0                         | 4%                          | 500                              |
| 20           | 300 ± 32                        | 73%                         | 70 ± 8    | 17%                         | 40 ± 13                        | 10%                         | 410                              |

**C. Lung**

| Time (weeks) | POB-DNA adducts (fmol/mg DNA)   |                             |           |                             |                                |                             | Total Adduct Levels <sup>c</sup> |
|--------------|---------------------------------|-----------------------------|-----------|-----------------------------|--------------------------------|-----------------------------|----------------------------------|
|              | <i>o</i> <sup>2</sup> -POB-dThd |                             | 7-POB-Gua |                             | <i>o</i> <sup>2</sup> -POB-Cyt |                             |                                  |
|              | Mean ± SD                       | Percentage (%) <sup>b</sup> | Mean ± SD | Percentage (%) <sup>b</sup> | Mean ± SD                      | Percentage (%) <sup>b</sup> |                                  |
| 1            | 50 ± 5                          | 63%                         | 20 ± 6    | 25%                         | 10 ± 3                         | 13%                         | 80                               |
| 2            | 80 ± 7                          | 67%                         | 30 ± 8    | 25%                         | 10 ± 3                         | 8%                          | 120                              |
| 5            | 160 ± 12                        | 76%                         | 40 ± 2    | 19%                         | 10 ± 2                         | 5%                          | 210                              |
| 10           | 260 ± 28                        | 70%                         | 70 ± 14   | 19%                         | 40 ± 7                         | 11%                         | 370                              |
| 16           | 290 ± 3                         | 76%                         | 60 ± 8    | 16%                         | 30 ± 3                         | 8%                          | 380                              |
| 20           | 230 ± 24                        | 74%                         | 50 ± 6    | 16%                         | 30 ± 6                         | 10%                         | 310                              |

- a. Each value is the mean ± S.D. of single analyses of DNA samples isolated from three rats or 3 pools of 3 rats per group at each time point.
- b. The percentage was calculated by dividing the mean level of each adduct by total adduct levels
- c. The value for total adduct levels is the sum of the mean levels of three POB-DNA adducts and rounded.

**Table 3. Levels of POB-DNA adducts in rats treated for 20 weeks with (*R*)-NNN or (*S*)-NNN<sup>a</sup>**

| Tissue    | Group            | O <sup>2</sup> -POB-dThd (fmol/μmol dThd) <sup>b</sup> | O <sup>2</sup> -POB-Cyt (fmol/μmol dCyd) <sup>b</sup> | 7-POB-Gua (fmol/μmol dGuo) <sup>b</sup> |
|-----------|------------------|--------------------------------------------------------|-------------------------------------------------------|-----------------------------------------|
| Esophagus | ( <i>R</i> )-NNN | 110 ± 16                                               | 50 ± 8                                                | 210 ± 62                                |
|           | ( <i>S</i> )-NNN | 560 ± 4                                                | 410 ± 64                                              | 550 ± 108                               |
| Liver     | ( <i>R</i> )-NNN | 50 ± 7                                                 | 0                                                     | 0                                       |
|           | ( <i>S</i> )-NNN | 470 ± 40                                               | 80 ± 21                                               | 110 ± 13                                |
| Lung      | ( <i>R</i> )-NNN | 600 ± 26                                               | 150 ± 40                                              | 150 ± 17                                |
|           | ( <i>S</i> )-NNN | 300 ± 32                                               | 60 ± 11                                               | 80 ± 9                                  |

- a. Each value is the mean ± S.D. of single analyses of DNA samples isolated from three rats or 3 pools of 3 rats per group at each time point.
- b. Levels of each POB-DNA adduct were expressed as fmol per appropriate μmol nucleoside. Contents of dGuo, dThd and dCyd were determined by HPLC.

**Table 4. Statistical comparison of levels of each individual POB-DNA adduct <sup>a</sup>**

**A. Esophagus**

| Time (weeks) | (R)-NNN                            |                       |                | (S)-NNN  |                |                |
|--------------|------------------------------------|-----------------------|----------------|----------|----------------|----------------|
|              | 11 <sup>b</sup> vs 14 <sup>b</sup> | 11 vs 15 <sup>b</sup> | 14 vs 15       | 11 vs 14 | 11 vs 15       | 14 vs 15       |
| 1            | <i>P</i> <0.01                     | <i>P</i> <0.01        | <i>P</i> <0.01 | NS       | NS             | <i>P</i> <0.01 |
| 2            | <i>P</i> <0.01                     | <i>P</i> <0.01        | <i>P</i> <0.01 | NS       | NS             | NS             |
| 5            | NS <sup>c</sup>                    | NS                    | NS             | NS       | <i>P</i> <0.01 | <i>P</i> <0.01 |
| 10           | NS                                 | NS                    | NS             | NS       | NS             | NS             |
| 16           | NS                                 | NS                    | <i>P</i> <0.01 | NS       | <i>P</i> <0.01 | <i>P</i> <0.01 |
| 20           | NS                                 | <i>P</i> <0.01        | <i>P</i> <0.01 | NS       | <i>P</i> <0.01 | NS             |

**B. Liver**

| Time (weeks) | (R)-NNN         |                |          | (S)-NNN        |                |                |
|--------------|-----------------|----------------|----------|----------------|----------------|----------------|
|              | 11 vs 14        | 11 vs 15       | 14 vs 15 | 11 vs 14       | 11 vs 15       | 14 vs 15       |
| 1            | NS              | <i>P</i> <0.01 | NS       | <i>P</i> <0.01 | <i>P</i> <0.01 | <i>P</i> <0.01 |
| 2            | NS              | NS             | NS       | NS             | <i>P</i> <0.01 | <i>P</i> <0.01 |
| 5            | NA <sup>d</sup> | NA             | NA       | <i>P</i> <0.01 | <i>P</i> <0.01 | <i>P</i> <0.01 |
| 10           | <i>P</i> <0.01  | <i>P</i> <0.01 | NS       | <i>P</i> <0.01 | <i>P</i> <0.01 | <i>P</i> <0.01 |
| 16           | NA              | NA             | NA       | <i>P</i> <0.01 | <i>P</i> <0.01 | <i>P</i> <0.01 |
| 20           | NA              | NA             | NA       | <i>P</i> <0.01 | <i>P</i> <0.01 | NS             |

**C. Lung**

| Time (weeks) | (R)-NNN        |                |                | (S)-NNN        |                |                |
|--------------|----------------|----------------|----------------|----------------|----------------|----------------|
|              | 11 vs 14       | 11 vs 15       | 14 vs 15       | 11 vs 14       | 11 vs 15       | 14 vs 15       |
| 1            | <i>P</i> <0.01 |
| 2            | <i>P</i> <0.01 |
| 5            | <i>P</i> <0.01 |
| 10           | <i>P</i> <0.01 |
| 16           | <i>P</i> <0.01 |
| 20           | <i>P</i> <0.01 | <i>P</i> <0.01 | NS             | <i>P</i> <0.01 | <i>P</i> <0.01 | <i>P</i> <0.01 |

a. A repeated measures analysis of variance was used to compare each adduct within each group at each time point.

b. Compound **11**: *O*<sup>2</sup>-POB-dThd; **14**:7-POB-Gua; **15**: *O*<sup>2</sup>-POB-Cyt.

c. NS: no significant difference (*P* > 0.01)

d. NA: not available due to levels of *O*<sup>2</sup>-POB-Cyt below the limit of detection of HPLC-ESI-MS/MS analysis
